# Supplementary material for: Functionalized planar aromatic rings as precursors to energetic N,N′-(4,6-dinitro-1,3-phenylene)dinitramide and its salts
Source: Royal Society of Chemistry journal article supplement (doi:10.1039/d2qm00092j), 2022-01-01
Supplement: d2qm00092j1.pdf [file d2qm00092j1.pdf]

## Electronic Supplementary Information

### Functionalized planar aromatic rings as precursors to energetic

### **N,N'-(4,6-dinitro-1,3-phenylene)dinitramide and its salts**

Jatinder Singh<sup>a</sup>, Sohan Lal,<sup>a</sup> Richard J. Staples<sup>b</sup>, Jean'ne M. Shreeve<sup>\*,a</sup>

<sup>a</sup> Department of Chemistry, University of Idaho, Moscow, Idaho, 83844-2343, United States

<sup>b</sup> Department of Chemistry, Michigan State University, East Lansing, Michigan 48824, United States

#### Table of contents

|                                                                       |         |
|-----------------------------------------------------------------------|---------|
| Physicochemical properties of compounds 3-8                           | S2-S7   |
| References                                                            | S8      |
| <sup>1</sup> H NMR, <sup>13</sup> C NMR and DSC data of compounds 3-8 | S9-S17  |
| Crystal structure data                                                | S18-S29 |

### Physicochemical properties of compounds 3-8

Gaussian 03 program<sup>1</sup> is used to optimize the geometry of the compounds 3-8. The heats of formation (gaseous) were calculated using isodesmic reactions (Scheme S1) as well as by the atomization method (equation 1).

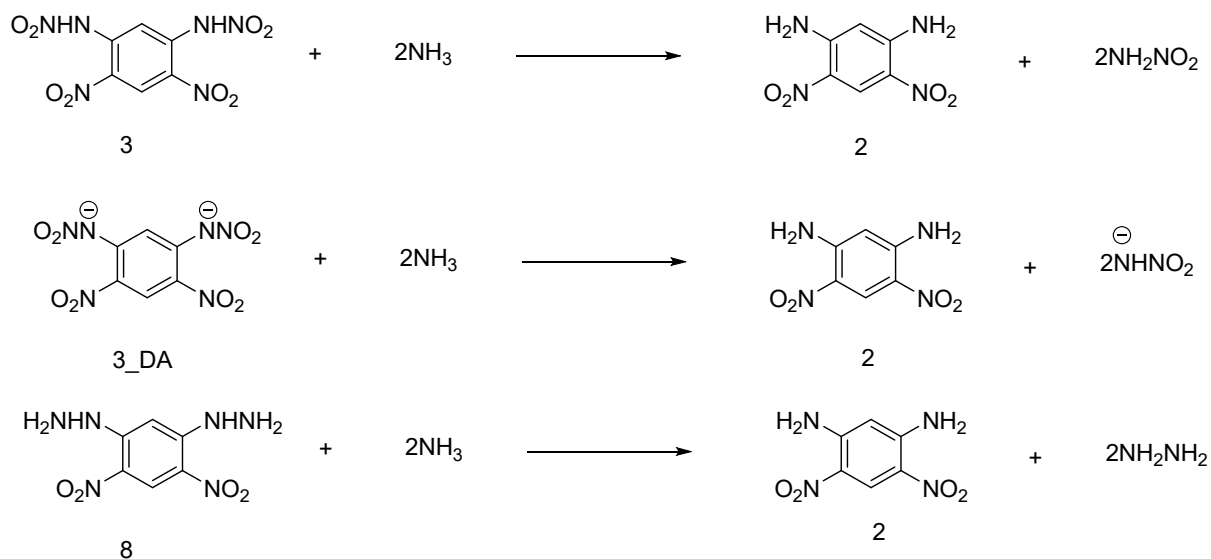

**Scheme S1:** Isodesmic reactions for compounds 3–8.

$$\Delta H_f(\text{salt}, 298 \text{ K}) = \Delta H_f(\text{anion}, 298 \text{ K}) + \Delta H_f(\text{cation}, 298 \text{ K}) - \text{Lattice Energy} \quad (1)$$

Lattice energy of the salts (4–7) was calculated by equation 2.<sup>2,3</sup>

$$\text{Lattice Energy (kJ/mol)} = 2I[\alpha(V_m)^{-1/3} + \beta] \quad (2)$$

$I$  is the ionic strength,  $\alpha$  (kJmol<sup>-1</sup>nm) and  $\beta$  (kJmol<sup>-1</sup>) are appropriate fitted coefficients and  $V_m$  (nm<sup>3</sup>) is volume of the salt. Values of  $I$ ,  $\alpha$  and  $\beta$  are derived from the literature<sup>3</sup> and  $V_m$  was obtained from crystal structure or derived from pycnometer densities.

**Table S1: Physicochemical properties of compounds 3–8.**

| Compound | Density <sup>a</sup>      | $\Delta H_f$<br>atomization(g) <sup>b</sup><br>(kJ mol <sup>-1</sup> )/kJg <sup>-1</sup> | P<br>(GPa) <sup>c</sup> | D <sub>V</sub><br>(m s <sup>-1</sup> ) <sup>d</sup> |
|----------|---------------------------|------------------------------------------------------------------------------------------|-------------------------|-----------------------------------------------------|
| <b>3</b> | 1.87 (1.91) <sup>e</sup>  | 149.41/0.52                                                                              | 34.0                    | 8682                                                |
| <b>4</b> | 1.74                      | 283.65/0.88                                                                              | 31.3                    | 8575                                                |
| <b>5</b> | 1.77* (1.74) <sup>e</sup> | 578.33/1.64                                                                              | 34.3                    | 8992                                                |
| <b>6</b> | 1.83                      | 365.50/1.03                                                                              | 37.7                    | 8980                                                |
| <b>7</b> | 1.76 (1.80) <sup>e</sup>  | 1277.35/2.14                                                                             | 28.3                    | 8525                                                |
| <b>8</b> | 1.72                      | 239.73/1.05                                                                              | 24.9                    | 8121                                                |

<sup>a</sup>Gas pycnometer density at 25 °C. <sup>b</sup>Heat of formation calculated using Gaussian 03 program B3LYP/6-311++G(d,p) level of theory. <sup>c</sup>Detonation pressure (GPa) calculated by using EXPLO5 software. <sup>d</sup>Detonation velocity (m/s) calculated by using EXPLO5 software. <sup>e</sup>X-Ray density. \*X-ray density for compound **5** is lower than the room temperature density because of solvent molecule in crystal lattice. All compounds were obtained as anhydrous powders (confirmed by elemental analysis) to determine the pycnometer density.

The solid phase heats of formation ( $\Delta H_f(s)$ ) of compounds **3**, **4** and **8** were calculated by using equation 3 (Hess's Law).<sup>4</sup>

$$\Delta H_f(s) = \Delta H_f(g) - \Delta H_{sub} \quad (3)$$

Where,  $\Delta H_{sub}$  is the heats of sublimation, which can be obtained from equation 4.<sup>5</sup>

$$\Delta H_{sub} = a(SA)^2 + b(\sigma_{tot}^2 v)^{0.5} + c \quad (4)$$

SA is surface area of the 0.001 electron/bohr<sup>3</sup> isosurface of the electron density of the title compound,  $a$ ,  $b$  and  $c$  are constant fitted parameters,  $\sigma_{tot}^2$  is the electron potential on the molecule's surface and  $v$  is the degree of balance between the positive and negative charges on the isosurface.<sup>5</sup>

**Table S2: Physicochemical properties of the title compounds in solid state**

| Compound | Density <sup>a</sup>     | HOF <sub>solid(s)</sub> <sup>b</sup><br>(kJ/mol)/kJg <sup>-1</sup> | DP<br>(GPa) <sup>c</sup> | DV<br>(m/s) <sup>d</sup> |
|----------|--------------------------|--------------------------------------------------------------------|--------------------------|--------------------------|
| <b>3</b> | 1.87 (1.91) <sup>e</sup> | 26.61/0.09                                                         | 32.8                     | 8554                     |
| <b>4</b> | 1.74                     | 109.31/0.34                                                        | 29.9                     | 8433                     |
| <b>8</b> | 1.72                     | 118.39/0.52                                                        | 23.5                     | 7951                     |

<sup>a</sup>Gas pycnometer density at 25 °C. <sup>b</sup>Heat of formation calculated using Gaussian 03 program B3LYP/6-311++G(d,p) level of theory. <sup>c</sup>Detonation pressure (GPa) calculated by using EXPLO5 software. <sup>d</sup>Detonation velocity (m/s) calculated by using EXPLO5 software. <sup>e</sup>X-Ray density.

**Table S3.** Atomic coordinates for optimized structure of compound **3**.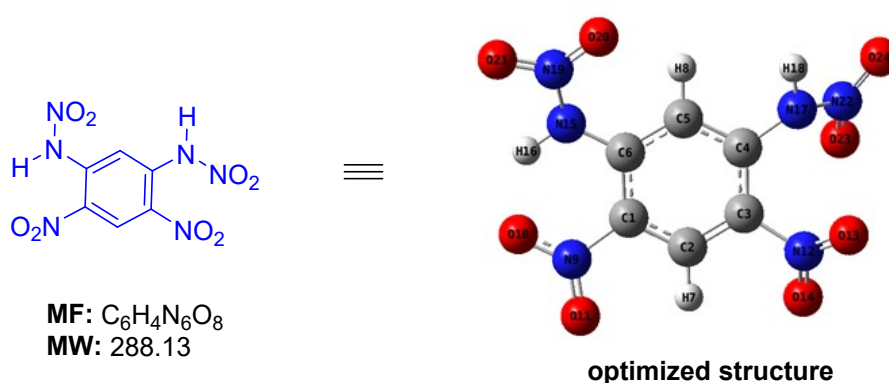

| Center Number | Atomic Symbol | Coordinates (Angstroms) |           |           |
|---------------|---------------|-------------------------|-----------|-----------|
|               |               | X                       | Y         | Z         |
| 1             | C             | 0.138199                | 0.893462  | -0.010260 |
| 2             | C             | 1.521399                | 0.999228  | 0.056907  |
| 3             | C             | 2.148826                | 2.220017  | -0.080177 |
| 4             | C             | 1.389209                | 3.370849  | -0.359164 |
| 5             | C             | 0.002769                | 3.259447  | -0.437927 |
| 6             | C             | -0.665943               | 2.044163  | -0.233931 |
| 7             | H             | 2.110708                | 0.113526  | 0.247207  |
| 8             | H             | -0.576730               | 4.135414  | -0.678968 |
| 9             | N             | -0.415159               | -0.458086 | 0.182671  |
| 10            | O             | -1.631850               | -0.620555 | 0.033145  |
| 11            | O             | 0.353280                | -1.353899 | 0.476739  |
| 12            | N             | 3.606776                | 2.243868  | 0.172280  |
| 13            | O             | 4.067514                | 3.252707  | 0.681522  |
| 14            | O             | 4.230815                | 1.231726  | -0.099301 |
| 15            | N             | -2.045917               | 1.922996  | -0.325533 |
| 16            | H             | -2.444622               | 0.989985  | -0.227800 |
| 17            | N             | 1.938457                | 4.646054  | -0.543831 |
| 18            | H             | 1.336930                | 5.454365  | -0.446367 |
| 19            | N             | -2.993095               | 2.930110  | -0.105796 |
| 20            | O             | -2.616267               | 4.086588  | -0.028617 |
| 21            | O             | -4.137004               | 2.524888  | -0.035134 |
| 22            | N             | 2.913928                | 4.903736  | -1.534639 |
| 23            | O             | 3.468514                | 3.948281  | -2.034579 |
| 24            | O             | 3.095835                | 6.082288  | -1.765042 |

E = -1161.080392 Hartree/particle

Method: B3LYP/6-311++G(d,p)

**Table S4.** Atomic coordinates for optimized structure of compound **3** anion.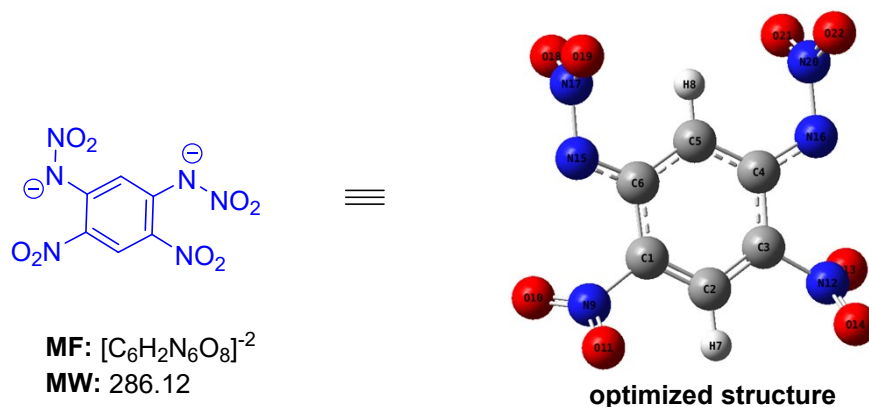

| Center Number | Atomic Symbol | Coordinates (Angstroms) |           |           |
|---------------|---------------|-------------------------|-----------|-----------|
|               |               | X                       | Y         | Z         |
| 1             | C             | 0.205798                | 0.741369  | -0.188910 |
| 2             | C             | 1.575687                | 0.691071  | -0.013883 |
| 3             | C             | 2.319878                | 1.844692  | -0.171224 |
| 4             | C             | 1.710890                | 3.119247  | -0.433629 |
| 5             | C             | 0.298154                | 3.148102  | -0.570765 |
| 6             | C             | -0.487893               | 1.971968  | -0.451597 |
| 7             | H             | 2.061724                | -0.244760 | 0.231668  |
| 8             | H             | -0.193130               | 4.092544  | -0.767310 |
| 9             | N             | -0.539867               | -0.529737 | -0.100157 |
| 10            | O             | -1.241056               | -0.822812 | -1.049496 |
| 11            | O             | -0.354785               | -1.193065 | 0.907804  |
| 12            | N             | 3.787822                | 1.729974  | -0.063910 |
| 13            | O             | 4.440342                | 2.135716  | -1.006465 |
| 14            | O             | 4.213866                | 1.201715  | 0.950601  |
| 15            | N             | -1.824681               | 1.920257  | -0.502590 |
| 16            | N             | 2.519075                | 4.185926  | -0.468089 |
| 17            | N             | -2.461971               | 3.174931  | -0.728494 |
| 18            | O             | -2.554145               | 3.527120  | -1.884828 |
| 19            | O             | -2.916496               | 3.707941  | 0.258945  |
| 20            | N             | 1.858147                | 5.427666  | -0.697897 |
| 21            | O             | 1.642959                | 5.711413  | -1.856629 |
| 22            | O             | 1.662690                | 6.099458  | 0.290178  |

E = -1159.782944 Hartree/particle

Method: B3LYP/6-311++G(d,p)

**Table S5.** Atomic coordinates for optimized structure of compound **8**.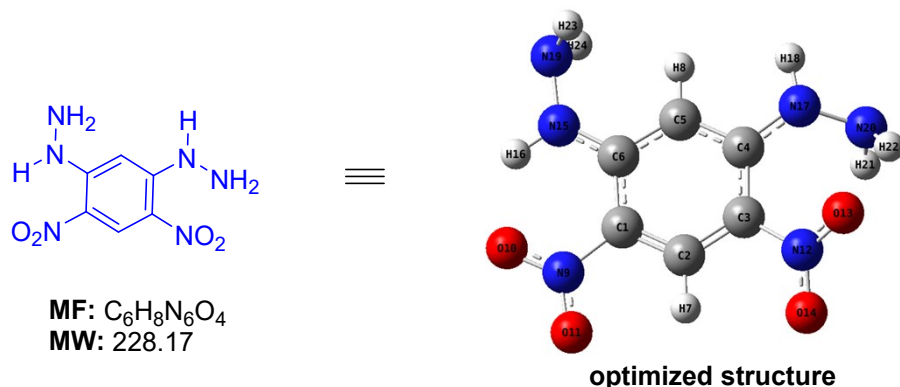

| Center Number | Atomic Symbol | Coordinates (Angstroms) |           |           |
|---------------|---------------|-------------------------|-----------|-----------|
|               |               | X                       | Y         | Z         |
| 1             | C             | -0.071388               | 0.925173  | 0.035702  |
| 2             | C             | 1.300341                | 0.887607  | -0.143691 |
| 3             | C             | 2.047656                | 2.036918  | -0.34446  |
| 4             | C             | 1.395902                | 3.302227  | -0.451199 |
| 5             | C             | 0.008184                | 3.323262  | -0.246949 |
| 6             | C             | -0.763861               | 2.185112  | 0.024541  |
| 7             | H             | 1.806362                | -0.065487 | -0.085671 |
| 8             | H             | -0.497750               | 4.274262  | -0.351797 |
| 9             | N             | -0.736921               | -0.344068 | 0.266885  |
| 10            | O             | -1.960490               | -0.337207 | 0.469813  |
| 11            | O             | -0.068973               | -1.369812 | 0.249740  |
| 12            | N             | 3.495365                | 1.868302  | -0.286212 |
| 13            | O             | 4.168287                | 2.799620  | 0.161448  |
| 14            | O             | 3.965670                | 0.792444  | -0.638530 |
| 15            | N             | -2.103115               | 2.283503  | 0.226309  |
| 16            | H             | -2.621755               | 1.435670  | 0.407722  |
| 17            | N             | 2.006295                | 4.490786  | -0.757132 |
| 18            | H             | 1.395610                | 5.293556  | -0.778989 |
| 19            | N             | -2.820696               | 3.480404  | 0.274159  |
| 20            | N             | 3.131442                | 4.666338  | -1.578680 |
| 21            | H             | 3.079825                | 4.057662  | -2.392723 |
| 22            | H             | 3.968827                | 4.440439  | -1.050093 |
| 23            | H             | -2.456480               | 4.097962  | 0.994676  |
| 24            | H             | -2.807529               | 3.952881  | -0.625527 |

E = -862.666635 Hartree/particle

Method: B3LYP/6-311++G(d,p)

## References

1. Gaussian 03, Revision C.02, M. J. Frisch, G. W. Trucks, H. B. Schlegel, G. E. Scuseria, M. A. Robb, J. R. Cheeseman, J. A. Montgomery, Jr., T. Vreven, K. N. Kudin, J. C. Burant, J. M. Millam, S. S. Iyengar, J. Tomasi, V. Barone, B. Mennucci, M. Cossi, G. Scalmani, N. Rega, G. A. Petersson, H. Nakatsuji, M. Hada, M. Ehara, K. Toyota, R. Fukuda, J. Hasegawa, M. Ishida, T. Nakajima, Y. Honda, O. Kitao, H. Nakai, M. Klene, X. Li, J. E. Knox, H. P. Hratchian, J. B. Cross, V. Bakken, C. Adamo, J. Jaramillo, R. Gomperts, R. E. Stratmann, O. Yazyev, A. J. Austin, R. Cammi, C. Pomelli, J. W. Ochterski, P. Y. Ayala, K. Morokuma, G. A. Voth, P. Salvador, J. J. Dannenberg, V. G. Zakrzewski, S. Dapprich, A. D. Daniels, M. C. Strain, O. Farkas, D. K. Malick, A. D. Rabuck, K. Raghavachari, J. B. Foresman, J. V. Ortiz, Q. Cui, A. G. Baboul, S. Clifford, J. Cioslowski, B. B. Stefanov, G. Liu, A. Liashenko, P. Piskorz, I. Komaromi, R. L. Martin, D. J. Fox, T. Keith, M. A. Al-Laham, C. Y. Peng, A. Nanayakkara, M. Challacombe, P. M. W. Gill, B. Johnson, W. Chen, M. W. Wong, C. Gonzalez, and J. A. Pople, Gaussian, Inc., Wallingford CT, **2004**.
2. H. Gao, J. M. Shreeve, *Chem. Rev.* **2011**, *111*, 7377.
3. H. D. B. Jenkins, D. Tudela, L. Glasser, *Inorg. Chem.* **2002**, *41*, 2364.
4. P. W. Atkins, *Physical Chemistry, Oxford University press: Oxford*, **1982**.
5. E. F. C. Byrd, B. M. Rice, *J. Phys. Chem. A* **2006**, *110*, 1005.



# $^1\text{H}$ NMR, $^{13}\text{C}$ NMR and DSC data of compounds 3-8.

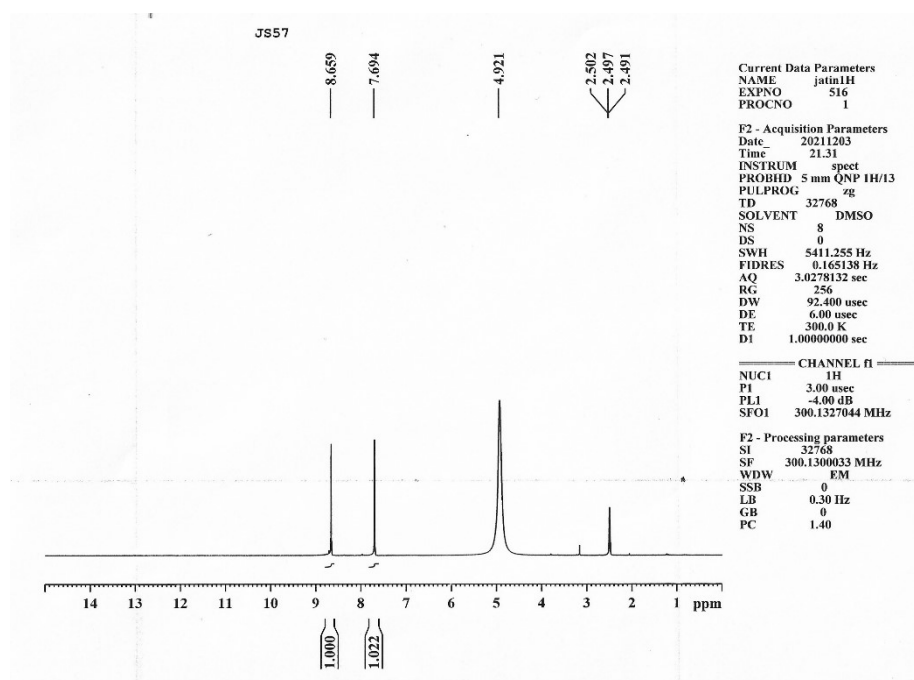

Figure S1:  $^1\text{H}$  NMR of compound 3

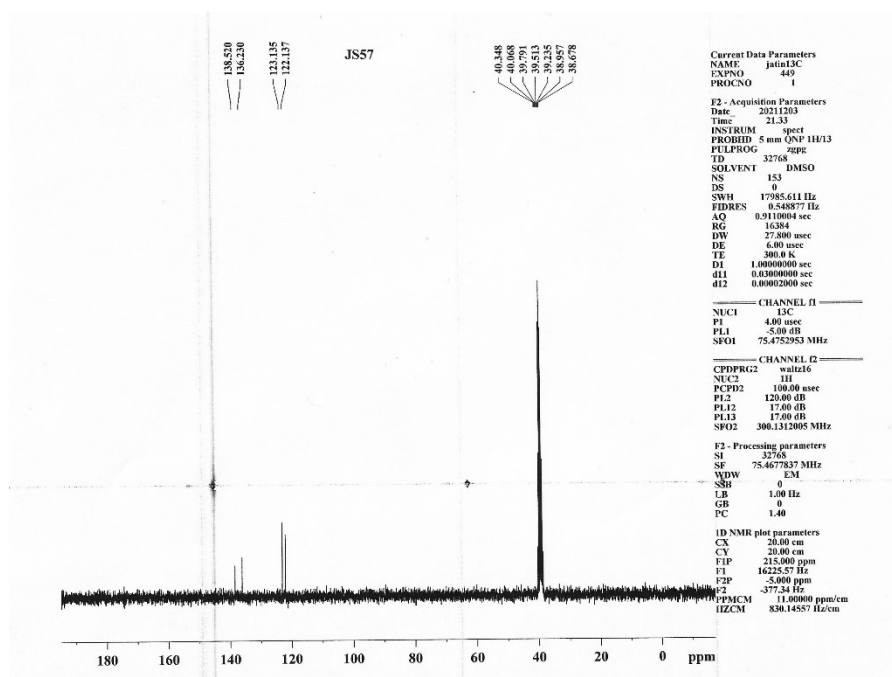

Figure S2:  $^{13}\text{C}$  NMR of compound 3

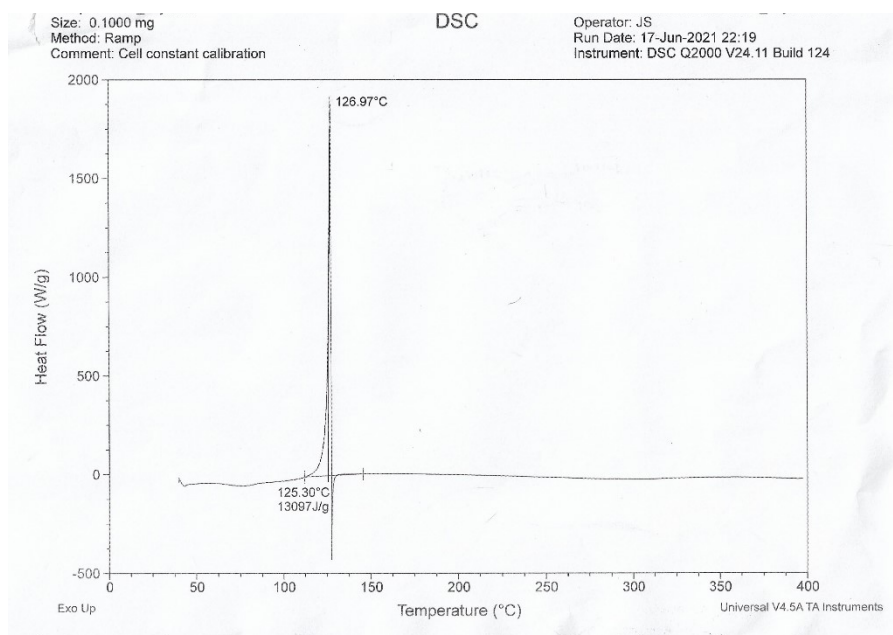

Figure S3: DSC of compound 3

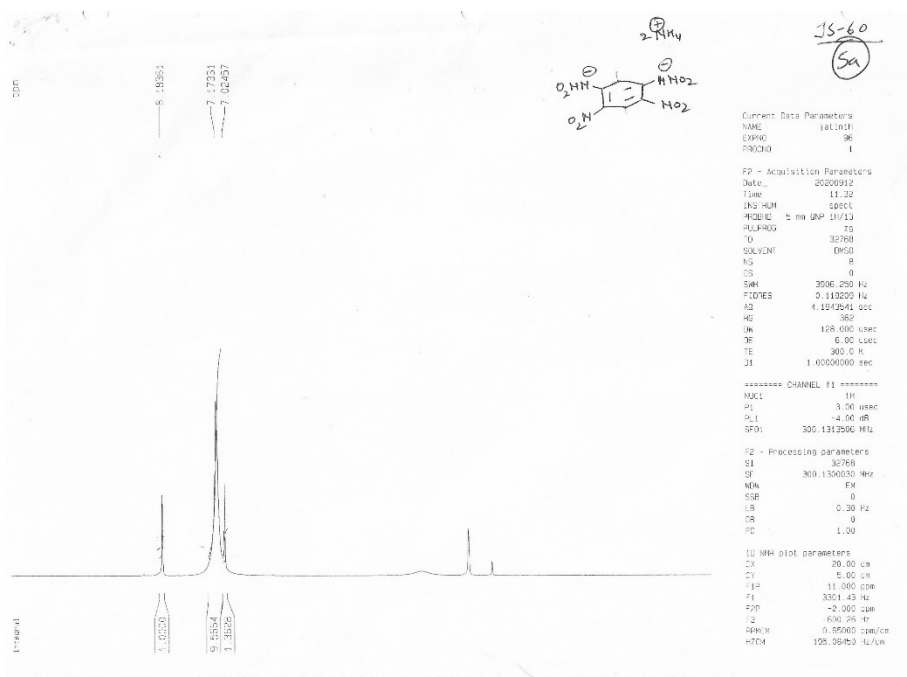

Figure S4: <sup>1</sup>H NMR of compound 4

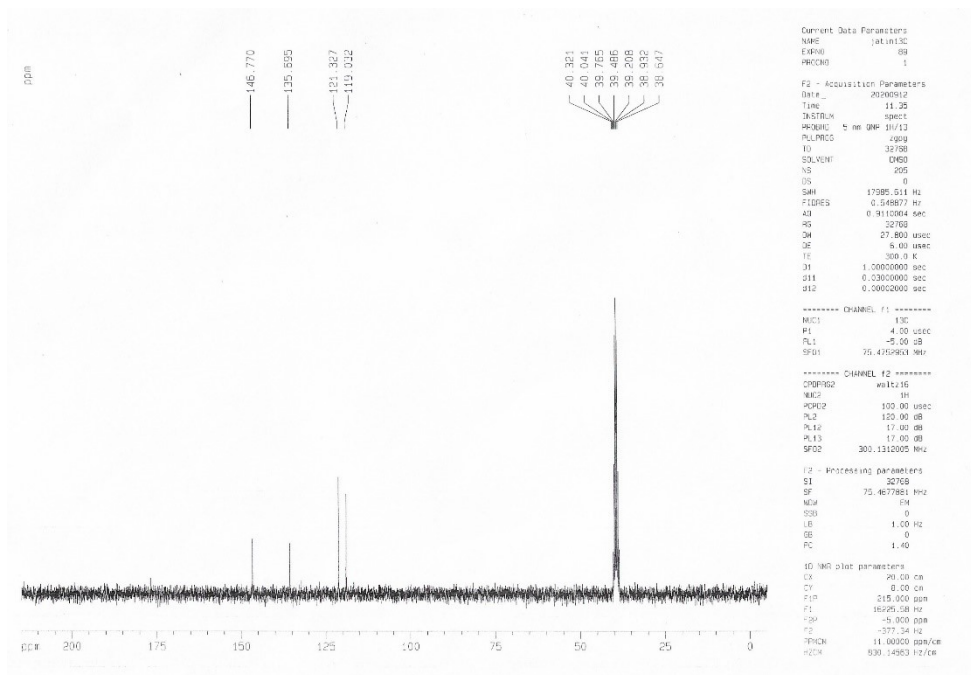

Figure S5: <sup>13</sup>C NMR of compound 4

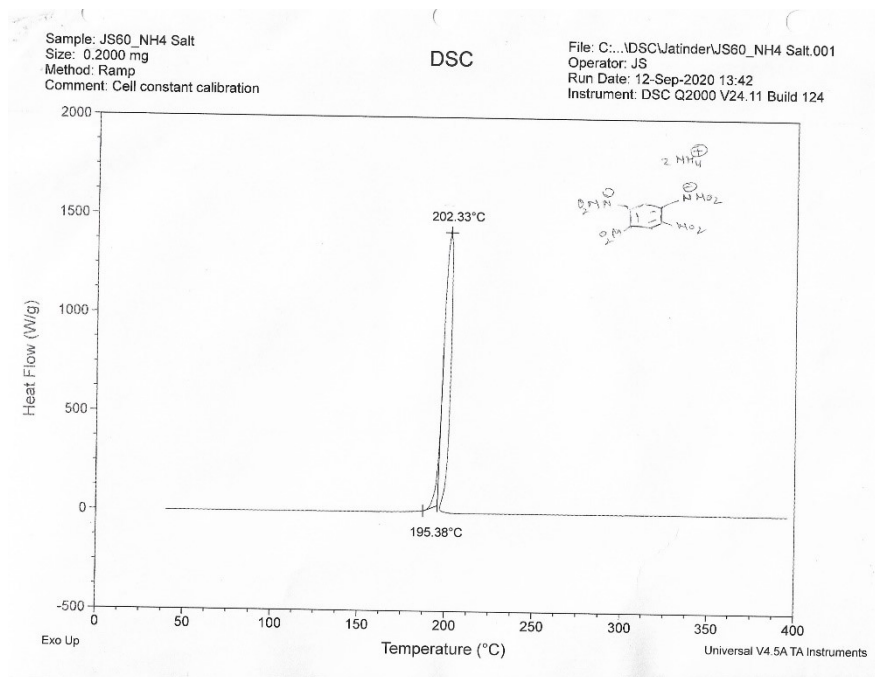

Figure S6: DSC of compound 4

Figure S7: <sup>1</sup>H NMR of compound 5

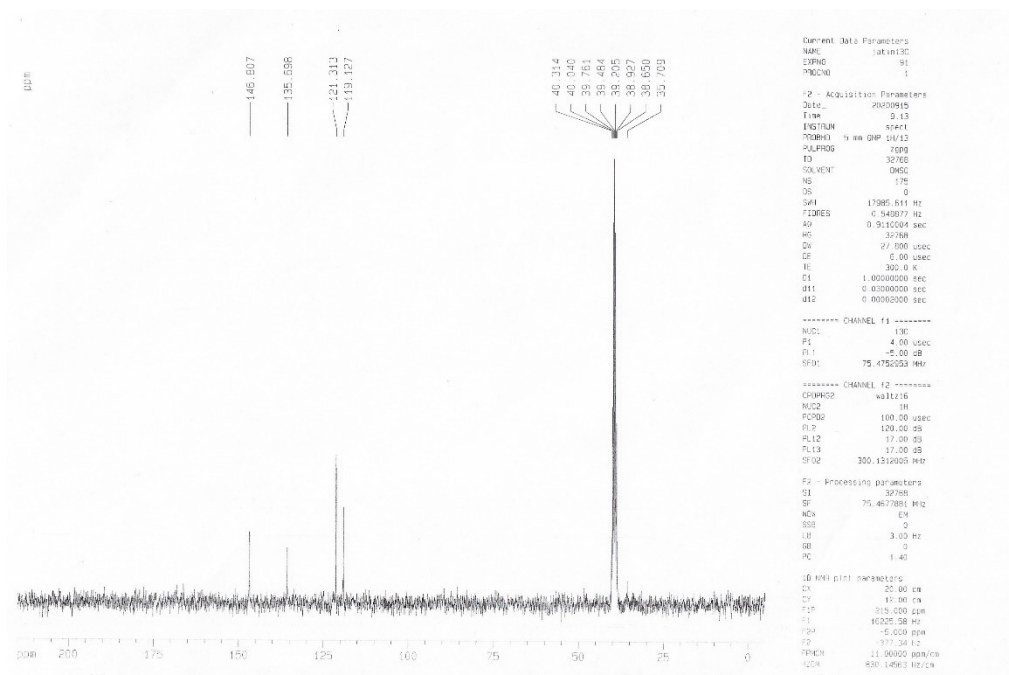

Figure S8: <sup>13</sup>C NMR of compound 5

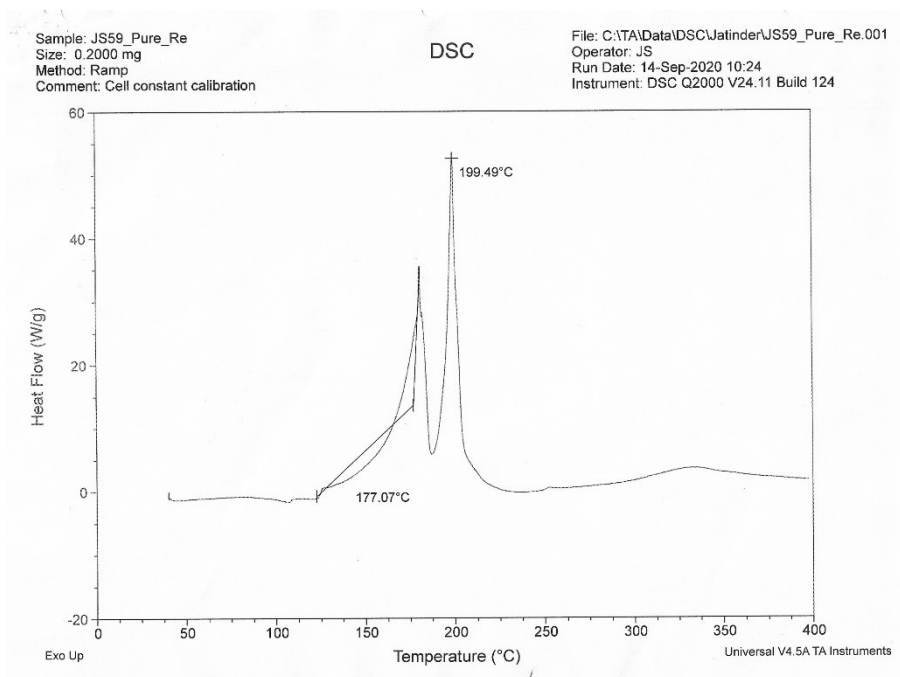

Figure S9: DSC of compound 5

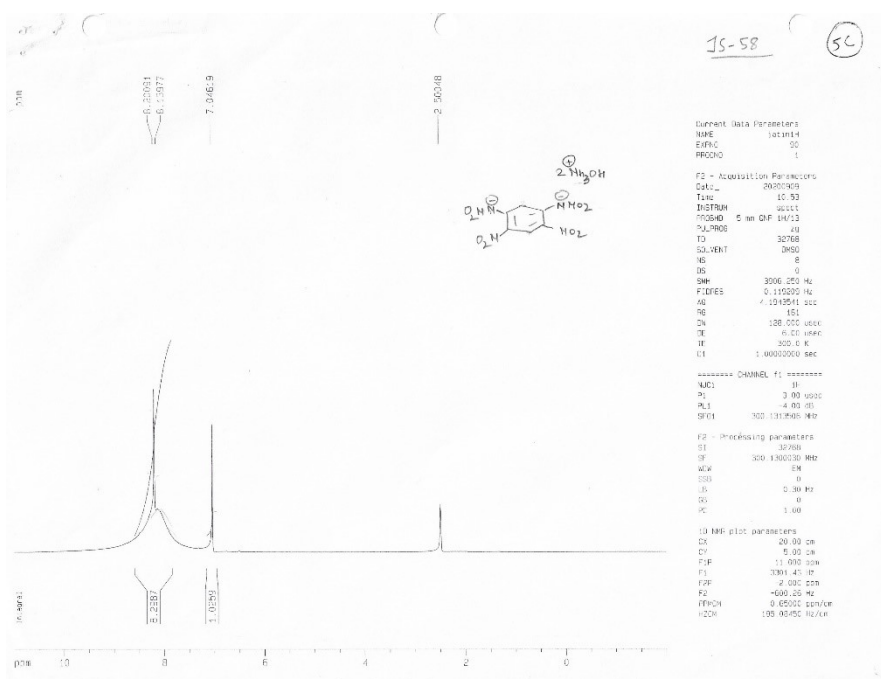

Figure S10: <sup>1</sup>H NMR of compound 6

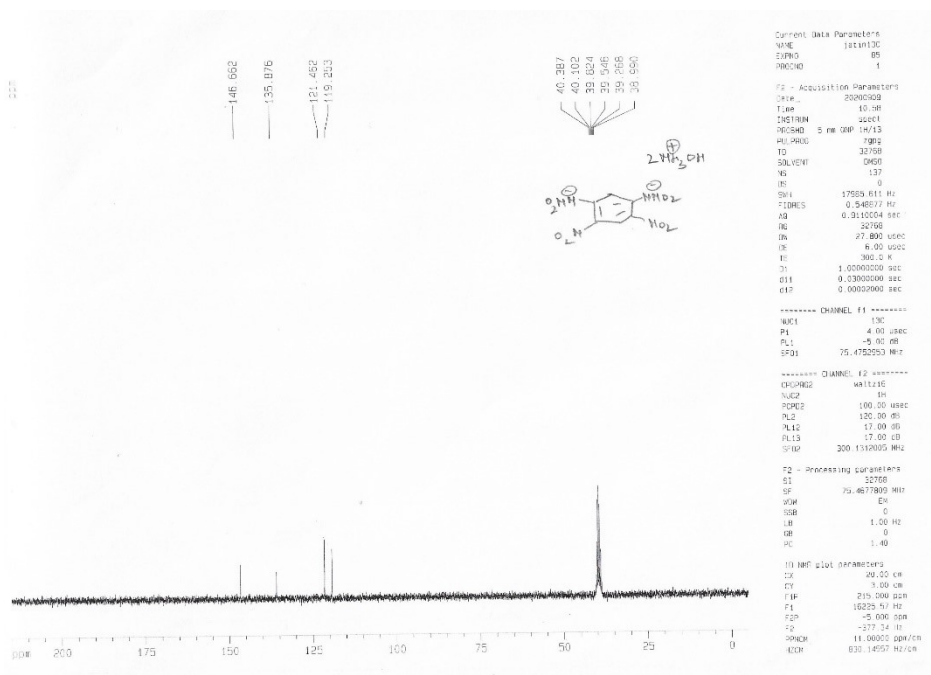

Figure S11: <sup>13</sup>C NMR of compound 6

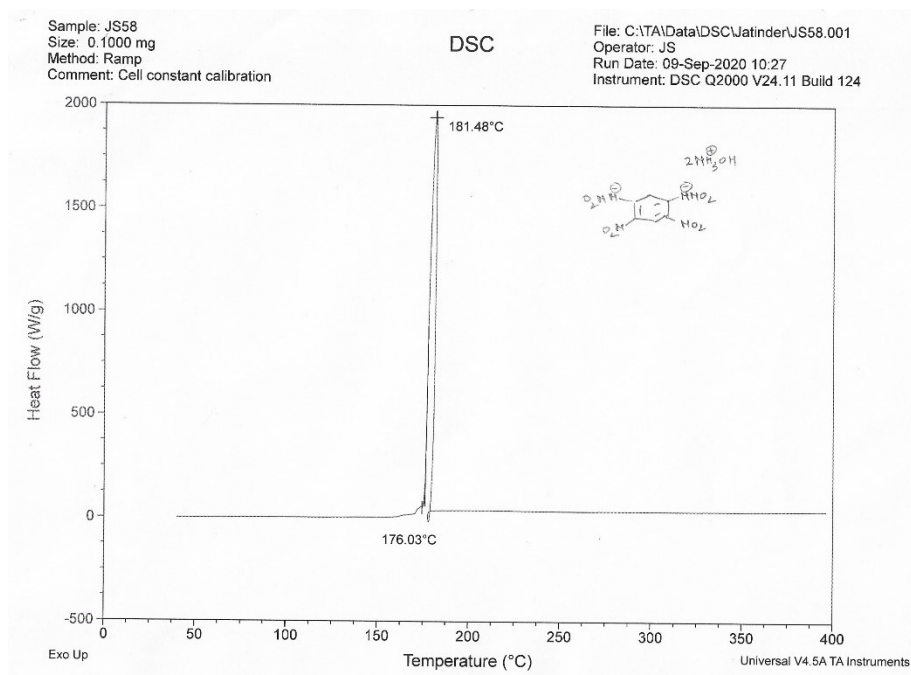

Figure S12: DSC of compound 6

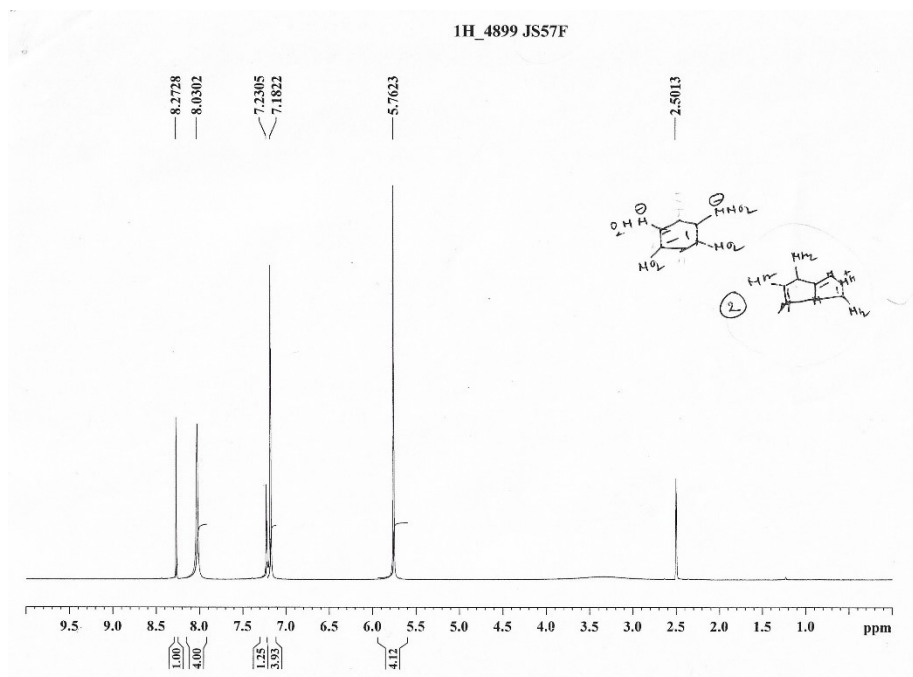

Figure S13:  $^1\text{H}$  NMR of compound 7

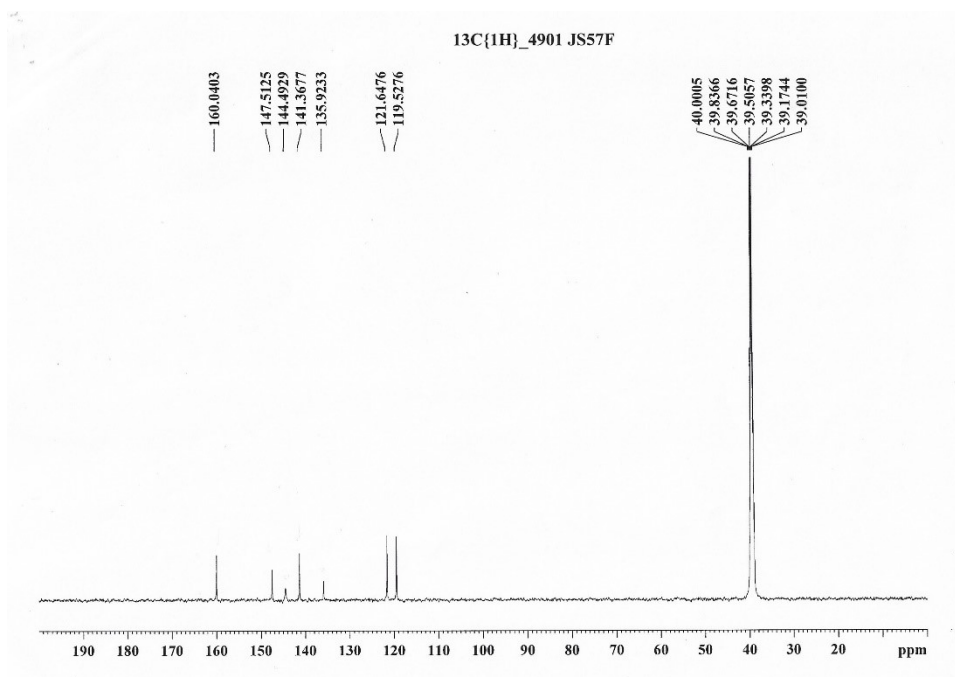

Figure S14:  $^{13}\text{C}$  NMR of compound 7

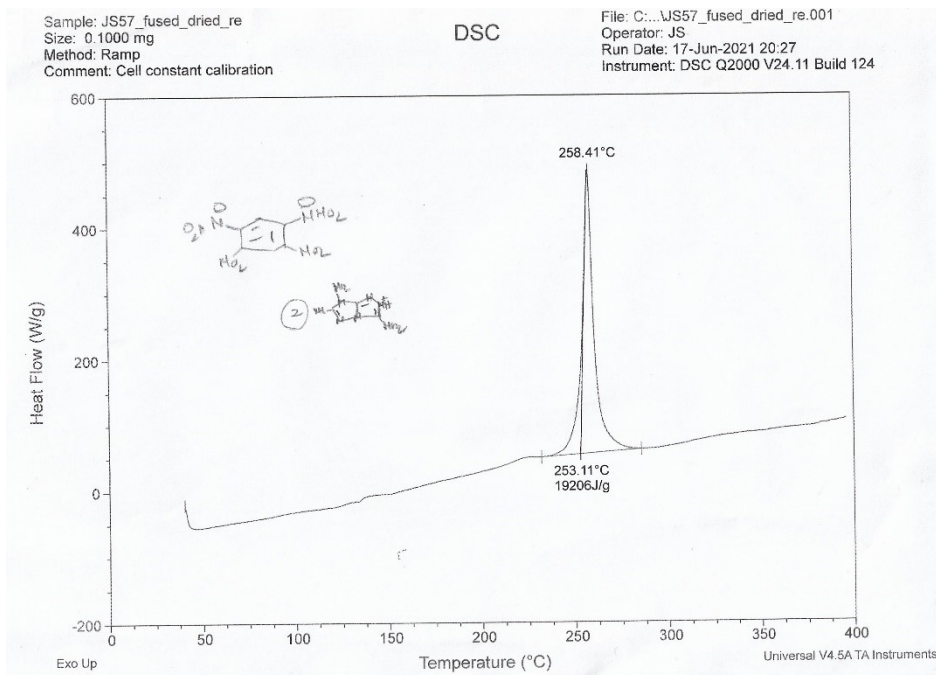

Figure S15: DSC of compound 7

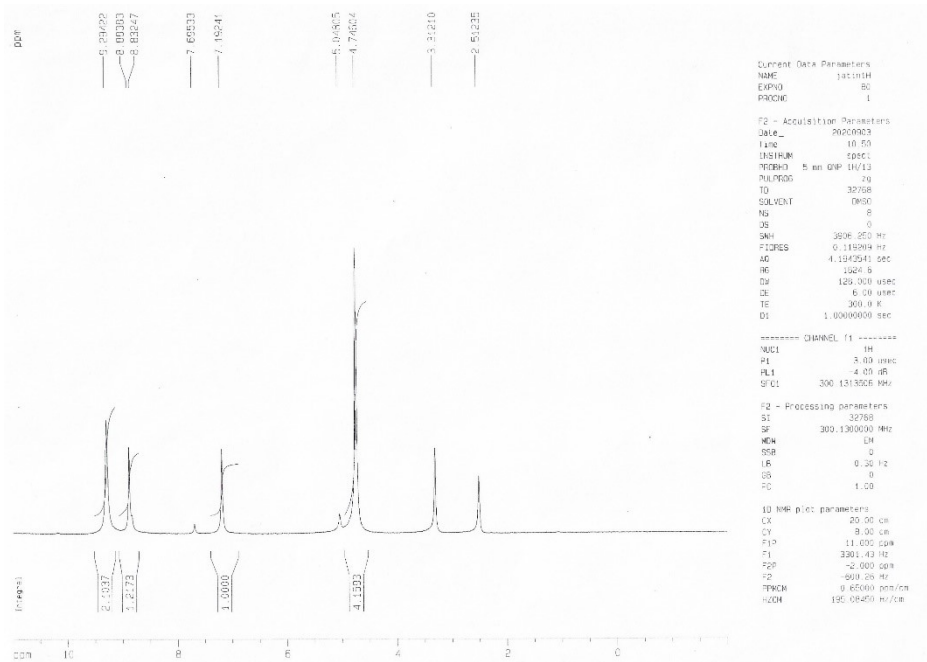

Figure S16: <sup>1</sup>H NMR of compound 8



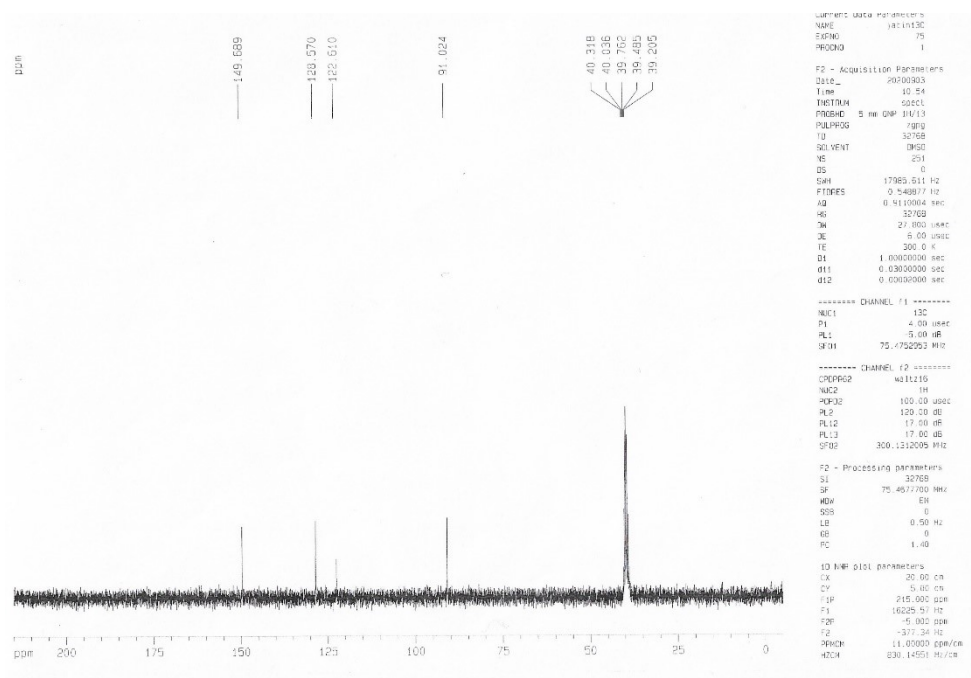

Figure S17: <sup>13</sup>C NMR of compound 8

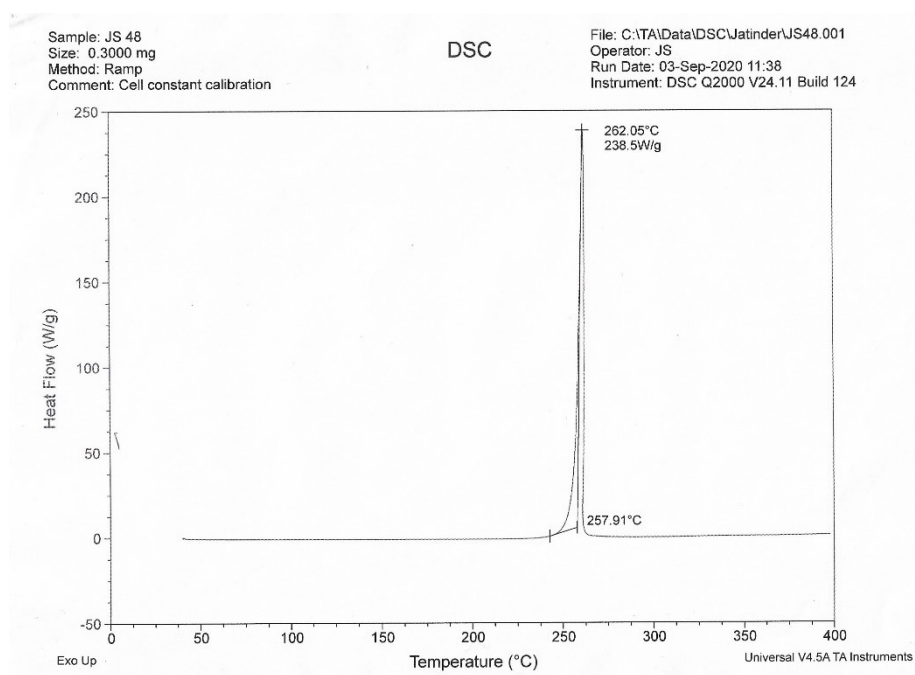

Figure S18: DSC of compound 8

## Crystal Structure Data

**Table S1:** Crystal data and structure refinement for compounds **3**, **5**·0.5CH<sub>3</sub>CN and **7**.

| Compound                     | <b>3</b>                                                    | <b>5</b> ·0.5CH <sub>3</sub> CN                                   | <b>7</b>                                                       |
|------------------------------|-------------------------------------------------------------|-------------------------------------------------------------------|----------------------------------------------------------------|
| CCDC #                       | 2100986                                                     | 2100987                                                           | 2100988                                                        |
| Formula                      | C <sub>6</sub> H <sub>4</sub> N <sub>6</sub> O <sub>8</sub> | C <sub>7</sub> H <sub>13.5</sub> N <sub>10.5</sub> O <sub>8</sub> | C <sub>12</sub> H <sub>16</sub> N <sub>22</sub> O <sub>8</sub> |
| $d_{calc.}/\text{g cm}^{-3}$ | 1.907                                                       | 1.736                                                             | 1.800                                                          |
| $\mu/\text{mm}^{-1}$         | 1.599                                                       | 1.371                                                             | 1.331                                                          |
| Formula Weight               | 288.15                                                      | 372.78                                                            | 596.47                                                         |
| Colour                       | orange                                                      | yellow                                                            | yellow                                                         |
| Shape                        | block                                                       | block                                                             | needle-shaped                                                  |
| Size/mm <sup>3</sup>         | 0.11×0.09×0.06                                              | 0.07×0.05×0.02                                                    | 0.20×0.04×0.03                                                 |
| $T/\text{K}$                 | 100.00(10)                                                  | 100.00(10)                                                        | 100.0(2)                                                       |
| Crystal System               | orthorhombic                                                | triclinic                                                         | triclinic                                                      |
| Flack Parameter              | 0.1(3)                                                      | -                                                                 | -                                                              |
| Hooft Parameter              | 0.15(12)                                                    | -                                                                 | -                                                              |
| Space Group                  | $Pca2_1$                                                    | $P-1$                                                             | $P-1$                                                          |
| $a/\text{\AA}$               | 15.9214(2)                                                  | 6.7679(2)                                                         | 6.74834(15)                                                    |
| $b/\text{\AA}$               | 6.89576(10)                                                 | 10.3865(4)                                                        | 8.47996(19)                                                    |
| $c/\text{\AA}$               | 9.14257(12)                                                 | 11.1358(5)                                                        | 20.5330(3)                                                     |
| $\alpha/^\circ$              | 90                                                          | 114.135(4)                                                        | 92.5744(15)                                                    |
| $\beta/^\circ$               | 90                                                          | 92.458(3)                                                         | 94.2528(16)                                                    |
| $\gamma/^\circ$              | 90                                                          | 91.245(3)                                                         | 109.608(2)                                                     |
| $V/\text{\AA}^3$             | 1003.76(2)                                                  | 713.04(5)                                                         | 1100.78(4)                                                     |
| $Z$                          | 4                                                           | 2                                                                 | 2                                                              |
| $Z'$                         | 1                                                           | 1                                                                 | 1                                                              |
| Wavelength/ $\text{\AA}$     | 1.54184                                                     | 1.54184                                                           | 1.54184                                                        |
| Radiation type               | Cu K $_{\alpha}$                                            | Cu K $_{\alpha}$                                                  | Cu K $_{\alpha}$                                               |
| $\theta_{min}/^\circ$        | 5.557                                                       | 4.670                                                             | 4.330                                                          |
| $\theta_{max}/^\circ$        | 77.084                                                      | 77.362                                                            | 80.222                                                         |
| Measured Refl's.             | 10587                                                       | 7238                                                              | 14565                                                          |
| Indep't Refl's               | 2013                                                        | 2825                                                              | 4679                                                           |
| Refl's $I \geq 2\sigma(I)$   | 1942                                                        | 2424                                                              | 4085                                                           |
| $R_{int}$                    | 0.0463                                                      | 0.0327                                                            | 0.0411                                                         |
| Parameters                   | 190                                                         | 268                                                               | 435                                                            |
| Restraints                   | 1                                                           | 1                                                                 | 0                                                              |
| Largest Peak                 | 0.212                                                       | 0.401                                                             | 0.279                                                          |
| Deepest Hole                 | -0.157                                                      | -0.710                                                            | -0.283                                                         |
| GooF                         | 1.031                                                       | 1.091                                                             | 1.058                                                          |
| $wR_2$ (all data)            | 0.0779                                                      | 0.1442                                                            | 0.1013                                                         |
| $wR_2$                       | 0.0767                                                      | 0.1386                                                            | 0.0975                                                         |
| $R_1$ (all data)             | 0.0307                                                      | 0.0606                                                            | 0.0431                                                         |
| $R_1$                        | 0.0294                                                      | 0.0519                                                            | 0.0377                                                         |

**Table S2:** Bond Lengths in Å for **3**.

| <b>Atom</b> | <b>Atom</b> | <b>Length/Å</b> |
|-------------|-------------|-----------------|
| O1          | N2          | 1.227(3)        |
| O2          | N2          | 1.216(3)        |
| O3          | N4          | 1.216(3)        |
| O4          | N4          | 1.233(3)        |
| O5          | N5          | 1.235(3)        |
| O6          | N5          | 1.223(3)        |
| O7          | N6          | 1.215(3)        |
| O8          | N6          | 1.232(3)        |
| N1          | N2          | 1.371(3)        |
| N1          | C1          | 1.392(3)        |
| N3          | N4          | 1.368(3)        |
| N3          | C3          | 1.394(3)        |
| N5          | C4          | 1.460(3)        |
| N6          | C6          | 1.462(3)        |
| C1          | C2          | 1.393(4)        |
| C1          | C6          | 1.407(3)        |
| C2          | C3          | 1.392(4)        |
| C3          | C4          | 1.406(3)        |
| C4          | C5          | 1.376(4)        |
| C5          | C6          | 1.381(4)        |

**Table S3:** Bond Angles in ° for **3**.

| <b>Atom</b> | <b>Atom</b> | <b>Atom</b> | <b>Angle/°</b> |
|-------------|-------------|-------------|----------------|
| N2          | N1          | C1          | 125.6(2)       |
| O1          | N2          | N1          | 113.2(2)       |
| O2          | N2          | O1          | 126.4(2)       |
| O2          | N2          | N1          | 120.4(2)       |
| N4          | N3          | C3          | 127.6(2)       |
| O3          | N4          | O4          | 125.4(2)       |
| O3          | N4          | N3          | 121.0(2)       |
| O4          | N4          | N3          | 113.6(2)       |
| O5          | N5          | C4          | 119.1(2)       |
| O6          | N5          | O5          | 122.9(2)       |
| O6          | N5          | C4          | 118.0(2)       |
| O7          | N6          | O8          | 123.1(2)       |
| O7          | N6          | C6          | 117.5(2)       |
| O8          | N6          | C6          | 119.4(2)       |
| N1          | C1          | C2          | 122.4(2)       |
| N1          | C1          | C6          | 118.8(2)       |
| C2          | C1          | C6          | 118.7(2)       |
| C3          | C2          | C1          | 121.5(2)       |
| N3          | C3          | C4          | 119.0(2)       |
| C2          | C3          | N3          | 122.7(2)       |
| C2          | C3          | C4          | 118.2(2)       |
| C3          | C4          | N5          | 123.8(2)       |
| C5          | C4          | N5          | 115.4(2)       |
| C5          | C4          | C3          | 120.9(2)       |
| C4          | C5          | C6          | 120.4(2)       |
| C1          | C6          | N6          | 123.7(2)       |
| C5          | C6          | N6          | 116.0(2)       |
| C5          | C6          | C1          | 120.2(2)       |

**Table S4:** Torsion Angles in ° for **3**.

| Atom | Atom | Atom | Atom | Angle/°   |
|------|------|------|------|-----------|
| O5   | N5   | C4   | C3   | -15.3(4)  |
| O5   | N5   | C4   | C5   | 163.9(2)  |
| O6   | N5   | C4   | C3   | 165.9(2)  |
| O6   | N5   | C4   | C5   | -14.9(3)  |
| O7   | N6   | C6   | C1   | 165.1(3)  |
| O7   | N6   | C6   | C5   | -13.9(4)  |
| O8   | N6   | C6   | C1   | -14.8(4)  |
| O8   | N6   | C6   | C5   | 166.2(2)  |
| N1   | C1   | C2   | C3   | 177.2(2)  |
| N1   | C1   | C6   | N6   | 6.4(4)    |
| N1   | C1   | C6   | C5   | -174.7(2) |
| N2   | N1   | C1   | C2   | 28.7(4)   |
| N2   | N1   | C1   | C6   | -153.6(3) |
| N3   | C3   | C4   | N5   | 1.3(4)    |
| N3   | C3   | C4   | C5   | -177.9(2) |
| N4   | N3   | C3   | C2   | 8.7(4)    |
| N4   | N3   | C3   | C4   | -170.7(2) |
| N5   | C4   | C5   | C6   | -179.4(2) |
| C1   | N1   | N2   | O1   | 165.9(3)  |
| C1   | N1   | N2   | O2   | -15.3(4)  |
| C1   | C2   | C3   | N3   | 178.3(2)  |
| C1   | C2   | C3   | C4   | -2.3(4)   |
| C2   | C1   | C6   | N6   | -175.7(2) |
| C2   | C1   | C6   | C5   | 3.2(4)    |
| C2   | C3   | C4   | N5   | -178.1(2) |
| C2   | C3   | C4   | C5   | 2.7(4)    |
| C3   | N3   | N4   | O3   | 3.5(4)    |
| C3   | N3   | N4   | O4   | -176.7(2) |
| C3   | C4   | C5   | C6   | -0.2(4)   |
| C4   | C5   | C6   | N6   | 176.2(2)  |
| C4   | C5   | C6   | C1   | -2.9(4)   |
| C6   | C1   | C2   | C3   | -0.6(4)   |

**Table S5:** Bond Lengths in Å for **5**·0.5CH<sub>3</sub>CN.

| <b>Atom</b> | <b>Atom</b> | <b>Length/Å</b> |
|-------------|-------------|-----------------|
| O1          | N2          | 1.265(3)        |
| O2          | N2          | 1.274(3)        |
| O3          | N4          | 1.273(3)        |
| O4          | N4          | 1.261(3)        |
| O5          | N5          | 1.232(3)        |
| O6          | N5          | 1.226(3)        |
| O7          | N6          | 1.224(3)        |
| O8          | N6          | 1.232(3)        |
| N1          | N2          | 1.301(3)        |
| N1          | C1          | 1.404(3)        |
| N3          | N4          | 1.301(3)        |
| N3          | C3          | 1.404(3)        |
| N5          | C4          | 1.460(3)        |
| N6          | C6          | 1.463(3)        |
| C1          | C2          | 1.399(3)        |
| C1          | C6          | 1.413(3)        |
| C2          | C3          | 1.402(3)        |
| C3          | C4          | 1.410(3)        |
| C4          | C5          | 1.375(3)        |
| C5          | C6          | 1.380(3)        |
| N7          | N8          | 1.449(3)        |
| N9          | N10         | 1.439(3)        |

**Table S6:** Bond Angles in ° for **5·0.5CH<sub>3</sub>CN**.

| <b>Atom</b> | <b>Atom</b> | <b>Atom</b> | <b>Angle/°</b> |
|-------------|-------------|-------------|----------------|
| N2          | N1          | C1          | 118.03(2)      |
| O1          | N2          | O2          | 118.57(2)      |
| O1          | N2          | N1          | 125.27(2)      |
| O2          | N2          | N1          | 116.09(2)      |
| N4          | N3          | C3          | 118.45(2)      |
| O3          | N4          | N3          | 115.93(2)      |
| O4          | N4          | O3          | 119.06(2)      |
| O4          | N4          | N3          | 124.9(2)       |
| O5          | N5          | C4          | 116.81(2)      |
| O6          | N5          | O5          | 123.5(2)       |
| O6          | N5          | C4          | 119.6(2)       |
| O7          | N6          | O8          | 123.6(2)       |
| O7          | N6          | C6          | 119.4(2)       |
| O8          | N6          | C6          | 117.00(2)      |
| N1          | C1          | C6          | 116.9(2)       |
| C2          | C1          | N1          | 125.3(2)       |
| C2          | C1          | C6          | 117.1(2)       |
| C1          | C2          | C3          | 122.6(2)       |
| N3          | C3          | C4          | 117.1(2)       |
| C2          | C3          | N3          | 125.2(2)       |
| C2          | C3          | C4          | 117.0(2)       |
| C3          | C4          | N5          | 122.2(2)       |
| C5          | C4          | N5          | 115.6(2)       |
| C5          | C4          | C3          | 122.2(2)       |
| C4          | C5          | C6          | 119.2(2)       |
| C1          | C6          | N6          | 122.9(2)       |
| C5          | C6          | N6          | 115.3(2)       |
| C5          | C6          | C1          | 121.8(2)       |
| N1S         | C2S         | C1S         | 170.6(1)       |

**Table S7:** Torsion Angles in ° for 5·0.5CH<sub>3</sub>CN.

| Atom | Atom | Atom | Atom | Angle/°   |
|------|------|------|------|-----------|
| O5   | N5   | C4   | C3   | 149.6(2)  |
| O5   | N5   | C4   | C5   | -30.0(3)  |
| O6   | N5   | C4   | C3   | -31.6(3)  |
| O6   | N5   | C4   | C5   | 148.8(2)  |
| O7   | N6   | C6   | C1   | 32.7(3)   |
| O7   | N6   | C6   | C5   | -147.9(2) |
| O8   | N6   | C6   | C1   | -148.9(2) |
| O8   | N6   | C6   | C5   | 30.4(3)   |
| N1   | C1   | C2   | C3   | 170.8(2)  |
| N1   | C1   | C6   | N6   | 8.0(3)    |
| N1   | C1   | C6   | C5   | -171.3(2) |
| N2   | N1   | C1   | C2   | 35.1(3)   |
| N2   | N1   | C1   | C6   | -154.6(2) |
| N3   | C3   | C4   | N5   | -8.8(3)   |
| N3   | C3   | C4   | C5   | 170.7(2)  |
| N4   | N3   | C3   | C2   | -36.7(3)  |
| N4   | N3   | C3   | C4   | 153.4(2)  |
| N5   | C4   | C5   | C6   | 179.91(2) |
| C1   | N1   | N2   | O1   | 2.9(3)    |
| C1   | N1   | N2   | O2   | 179.86(2) |
| C1   | C2   | C3   | N3   | -170.4(2) |
| C1   | C2   | C3   | C4   | -0.6(3)   |
| C2   | C1   | C6   | N6   | 179.08(2) |
| C2   | C1   | C6   | C5   | -0.2(3)   |
| C2   | C3   | C4   | C5   | 0.0(3)    |
| C3   | N3   | N4   | O3   | 178.63(2) |
| C3   | N3   | N4   | O4   | -4.4(3)   |
| C3   | C4   | C5   | C6   | 0.4(3)    |
| C4   | C5   | C6   | C1   | -0.3(3)   |
| C6   | C1   | C2   | C3   | 0.6(3)    |



**Table S8:** Bond Lengths in Å for 7.

| Atom | Atom | Length/Å  |
|------|------|-----------|
| O1   | N2   | 1.2736(2) |
| O2   | N2   | 1.2830(2) |
| O3   | N4   | 1.2569(2) |
| O4   | N4   | 1.2716(2) |
| O5   | N5   | 1.2271(2) |
| O6   | N5   | 1.2312(2) |
| O7   | N6   | 1.2324(2) |
| O8   | N6   | 1.2254(2) |
| N1   | N2   | 1.2867(2) |
| N1   | C1   | 1.4039(2) |
| N3   | N4   | 1.3080(2) |
| N3   | C3   | 1.3939(2) |
| N5   | C4   | 1.4601(2) |
| N6   | C6   | 1.4583(2) |
| C1   | C2   | 1.393(2)  |
| C1   | C6   | 1.405(2)  |
| C2   | C3   | 1.398(2)  |
| C3   | C4   | 1.409(2)  |
| C4   | C5   | 1.383(2)  |
| C5   | C6   | 1.381(2)  |
| N7   | N8   | 1.3966(2) |
| N7   | C7   | 1.3947(2) |
| N7   | C8   | 1.3575(2) |
| N9   | N10  | 1.4081(2) |
| N9   | C8   | 1.304(2)  |
| N10  | C9   | 1.3414(2) |
| N11  | N12  | 1.4016(2) |
| N11  | C8   | 1.3547(2) |
| N11  | C9   | 1.3500(2) |
| N12  | C7   | 1.3270(2) |
| N13  | C7   | 1.3369(2) |
| N14  | C9   | 1.325(2)  |
| N15  | N16  | 1.3956(2) |
| N15  | C10  | 1.3904(2) |
| N15  | C11  | 1.3639(2) |
| N17  | N18  | 1.4048(2) |
| N17  | C11  | 1.3043(2) |
| N18  | C12  | 1.338(2)  |
| N19  | N20  | 1.4010(2) |
| N19  | C11  | 1.3533(2) |
| N19  | C12  | 1.3499(2) |
| N20  | C10  | 1.3278(2) |
| N21  | C12  | 1.323(2)  |
| N22  | C10  | 1.3332(2) |

**Table S9:** Bond Angles in ° for 7.

| Atom | Atom | Atom | Angle/°    |
|------|------|------|------------|
| N2   | N1   | C1   | 115.76(12) |
| O1   | N2   | O2   | 117.90(11) |
| O1   | N2   | N1   | 117.68(12) |
| O2   | N2   | N1   | 124.38(12) |
| N4   | N3   | C3   | 117.86(12) |
| O3   | N4   | O4   | 120.75(12) |
| O3   | N4   | N3   | 124.59(12) |
| O4   | N4   | N3   | 114.64(12) |
| O5   | N5   | O6   | 123.67(13) |
| O5   | N5   | C4   | 117.91(12) |
| O6   | N5   | C4   | 118.29(12) |
| O7   | N6   | C6   | 117.25(12) |
| O8   | N6   | O7   | 124.21(12) |
| O8   | N6   | C6   | 118.49(12) |
| N1   | C1   | C6   | 126.84(13) |
| C2   | C1   | N1   | 116.08(13) |
| C2   | C1   | C6   | 116.91(13) |
| C1   | C2   | C3   | 123.11(13) |
| N3   | C3   | C2   | 114.40(13) |
| N3   | C3   | C4   | 128.49(13) |
| C2   | C3   | C4   | 116.91(13) |
| C3   | C4   | N5   | 122.18(13) |
| C5   | C4   | N5   | 115.84(13) |
| C5   | C4   | C3   | 121.53(13) |
| C6   | C5   | C4   | 119.22(13) |
| C1   | C6   | N6   | 122.15(13) |
| C5   | C6   | N6   | 115.96(12) |
| C5   | C6   | C1   | 121.89(13) |
| C7   | N7   | N8   | 129.71(13) |
| C8   | N7   | N8   | 123.72(12) |
| C8   | N7   | C7   | 106.46(12) |
| C8   | N9   | N10  | 100.64(11) |
| C9   | N10  | N9   | 113.17(12) |
| C8   | N11  | N12  | 113.93(12) |
| C9   | N11  | N12  | 138.65(12) |
| C9   | N11  | C8   | 107.22(12) |
| C7   | N12  | N11  | 100.97(11) |
| N12  | C7   | N7   | 113.54(13) |
| N12  | C7   | N13  | 125.35(13) |
| N13  | C7   | N7   | 121.09(13) |
| N9   | C8   | N7   | 140.52(14) |
| N9   | C8   | N11  | 114.39(13) |
| N11  | C8   | N7   | 105.08(12) |
| N10  | C9   | N11  | 104.56(12) |
| N14  | C9   | N10  | 129.90(14) |
| N14  | C9   | N11  | 125.53(14) |
| C10  | N15  | N16  | 123.05(12) |
| C11  | N15  | N16  | 130.87(12) |
| C11  | N15  | C10  | 105.99(12) |
| C11  | N17  | N18  | 100.81(11) |

| <b>Atom</b> | <b>Atom</b> | <b>Atom</b> | <b>Angle<sup>°</sup></b> |
|-------------|-------------|-------------|--------------------------|
| C12         | N18         | N17         | 113.26(12)               |
| C11         | N19         | N20         | 114.01(12)               |
| C12         | N19         | N20         | 138.55(12)               |
| C12         | N19         | C11         | 107.38(12)               |
| C10         | N20         | N19         | 100.72(11)               |
| N20         | C10         | N15         | 114.06(12)               |
| N20         | C10         | N22         | 125.58(13)               |
| N22         | C10         | N15         | 120.30(13)               |
| N17         | C11         | N15         | 140.75(14)               |
| N17         | C11         | N19         | 114.08(13)               |
| N19         | C11         | N15         | 105.16(12)               |
| N18         | C12         | N19         | 104.47(13)               |
| N21         | C12         | N18         | 128.45(14)               |
| N21         | C12         | N19         | 127.07(14)               |

**Table S10:** Torsion Angles in ° 7.

| Atom | Atom | Atom | Atom | Angle°      |
|------|------|------|------|-------------|
| O5   | N5   | C4   | C3   | 30.06(19)   |
| O5   | N5   | C4   | C5   | -142.37(13) |
| O6   | N5   | C4   | C3   | -153.82(13) |
| O6   | N5   | C4   | C5   | 33.74(18)   |
| O7   | N6   | C6   | C1   | -143.91(13) |
| O7   | N6   | C6   | C5   | 36.26(18)   |
| O8   | N6   | C6   | C1   | 38.47(19)   |
| O8   | N6   | C6   | C5   | -141.36(13) |
| N1   | C1   | C2   | C3   | -179.45(13) |
| N1   | C1   | C6   | N6   | 1.4(2)      |
| N1   | C1   | C6   | C5   | -178.77(13) |
| N2   | N1   | C1   | C2   | -137.06(13) |
| N2   | N1   | C1   | C6   | 47.9(2)     |
| N3   | C3   | C4   | N5   | 8.5(2)      |
| N3   | C3   | C4   | C5   | -179.50(13) |
| N4   | N3   | C3   | C2   | -143.07(14) |
| N4   | N3   | C3   | C4   | 42.3(2)     |
| N5   | C4   | C5   | C6   | 168.63(12)  |
| C1   | N1   | N2   | O1   | -174.99(12) |
| C1   | N1   | N2   | O2   | 7.4(2)      |
| C1   | C2   | C3   | N3   | -177.27(13) |
| C1   | C2   | C3   | C4   | -2.0(2)     |
| C2   | C1   | C6   | N6   | -173.61(12) |
| C2   | C1   | C6   | C5   | 6.2(2)      |
| C2   | C3   | C4   | N5   | -166.02(13) |
| C2   | C3   | C4   | C5   | 6.0(2)      |
| C3   | N3   | N4   | O3   | 4.2(2)      |
| C3   | N3   | N4   | O4   | -177.54(12) |
| C3   | C4   | C5   | C6   | -3.9(2)     |
| C4   | C5   | C6   | N6   | 177.35(12)  |
| C4   | C5   | C6   | C1   | -2.5(2)     |
| C6   | C1   | C2   | C3   | -3.9(2)     |
| N8   | N7   | C7   | N12  | 174.85(14)  |
| N8   | N7   | C7   | N13  | -7.1(2)     |
| N8   | N7   | C8   | N9   | 6.6(3)      |
| N8   | N7   | C8   | N11  | -174.87(13) |
| N9   | N10  | C9   | N11  | 0.71(16)    |
| N9   | N10  | C9   | N14  | 179.36(15)  |
| N10  | N9   | C8   | N7   | 177.32(19)  |
| N10  | N9   | C8   | N11  | -1.13(16)   |
| N11  | N12  | C7   | N7   | 0.45(15)    |
| N11  | N12  | C7   | N13  | -177.50(14) |
| N12  | N11  | C8   | N7   | -1.48(16)   |
| N12  | N11  | C8   | N9   | 177.49(12)  |
| N12  | N11  | C9   | N10  | -175.58(16) |
| N12  | N11  | C9   | N14  | 5.7(3)      |
| C7   | N7   | C8   | N9   | -176.91(19) |
| C7   | N7   | C8   | N11  | 1.63(15)    |
| C8   | N7   | C7   | N12  | -1.37(17)   |

| <b>Atom</b> | <b>Atom</b> | <b>Atom</b> | <b>Atom</b> | <b>Angle<sup>°</sup></b> |
|-------------|-------------|-------------|-------------|--------------------------|
| C8          | N7          | C7          | N13         | 176.68(13)               |
| C8          | N9          | N10         | C9          | 0.23(16)                 |
| C8          | N11         | N12         | C7          | 0.65(15)                 |
| C8          | N11         | C9          | N10         | -1.33(16)                |
| C8          | N11         | C9          | N14         | 179.93(15)               |
| C9          | N11         | N12         | C7          | 174.64(17)               |
| C9          | N11         | C8          | N7          | -177.33(12)              |
| C9          | N11         | C8          | N9          | 1.65(17)                 |
| N16         | N15         | C10         | N20         | -179.05(13)              |
| N16         | N15         | C10         | N22         | -1.8(2)                  |
| N16         | N15         | C11         | N17         | -0.2(3)                  |
| N16         | N15         | C11         | N19         | 178.80(14)               |
| N17         | N18         | C12         | N19         | 0.17(16)                 |
| N17         | N18         | C12         | N21         | 179.26(15)               |
| N18         | N17         | C11         | N15         | 179.23(19)               |
| N18         | N17         | C11         | N19         | 0.25(16)                 |
| N19         | N20         | C10         | N15         | 1.02(15)                 |
| N19         | N20         | C10         | N22         | -176.08(14)              |
| N20         | N19         | C11         | N15         | -1.80(16)                |
| N20         | N19         | C11         | N17         | 177.53(12)               |
| N20         | N19         | C12         | N18         | -176.83(16)              |
| N20         | N19         | C12         | N21         | 4.1(3)                   |
| C10         | N15         | C11         | N17         | -176.79(19)              |
| C10         | N15         | C11         | N19         | 2.24(15)                 |
| C11         | N15         | C10         | N20         | -2.15(17)                |
| C11         | N15         | C10         | N22         | 175.11(13)               |
| C11         | N17         | N18         | C12         | -0.25(16)                |
| C11         | N19         | N20         | C10         | 0.51(15)                 |
| C11         | N19         | C12         | N18         | -0.01(16)                |
| C11         | N19         | C12         | N21         | -179.12(15)              |
| C12         | N19         | N20         | C10         | 177.19(17)               |
| C12         | N19         | C11         | N15         | -179.50(12)              |
| C12         | N19         | C11         | N17         | -0.16(18)                |
